# Supplementary material
Source: Springer Nature journal article supplement (https://www.springermedizin.de/resource/supplementary/13550_2012_146_MOESM3_ESM.pdf/9687644)

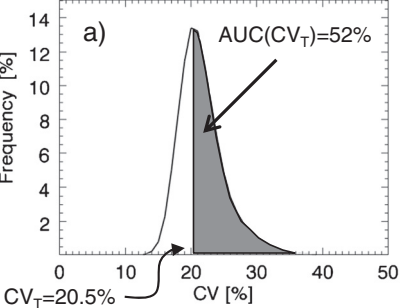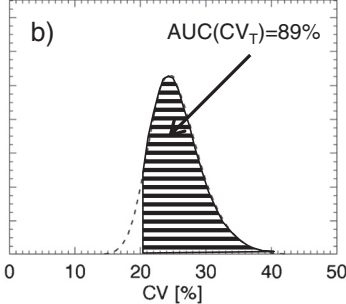

Supplement: MOESM3 [file 9687644]
